# Supplementary material
Source: Copernicus journal article supplement (doi:10.5194/egusphere-2023-906)
Supplement: Supplementary file [file egusphere-2023-906-AC1-supplement.pdf]

## **Reviewer #1**

In this paper, the authors investigated a 2022 M6.0 earthquake sequence along the North Anatolian Fault to understand the preparation, initiation, and the rupture processes of the M6.0 earthquake. They first investigated the existing catalogs with several decades of recorded earthquakes in this area to understand the long-term stress accumulation. They also performed AI-aided earthquake detection, location, and relocation to the recorded waveforms before and after the mainshock to understand the initiation and the mainshock geometry. Moreover, they calculated the earthquake rupture directivity to understand major rupture processes.

The authors performed comprehensive and rigorous analyses of the whole sequence. The content fit the scope of SE and the results are well presented. However, the scientific question is not efficiently demonstrated in the introduction section. Here are more detailed comments.

Reply: We thank the Reviewer for the constructive comments that have greatly contributed to improve the manuscript. Below is a reply to the comments in a point by point protocol. Legend: Comments by Reviewer are in blue, Replies by the Authors are in black.

### **Major comments:**

Introduction section: The authors provide a lot of details about the tectonics and historic earthquakes around the study area. However, there is limited description about the importance and the motivation of this work. Why is it necessary to learn this M6.0 earthquake sequence? How does it imply to the occurrence of great earthquakes in this area? How does the seismotectonic setting help us to understand the importance of this sequence? Why are the analyses performed in this study helpful to understand some key scientific questions? It would be better to point out the motivation, main findings, and importance of this study clearly in the introduction section so that the audiences know what to expect in the following sections.

Reply: Thank you for this comment. Indeed, the initial submission did not elaborate much on the primary motivations behind studying this sequence and the key scientific questions addressed. Therefore, in the revised version we have intensively rewritten the Intro to reflect these topics. To maintain the length of the paper, we removed some paragraphs regarding details on the Gölyaka event and the 1999 Izmit and Düzce sequences that were not totally relevant for the present study. We hope that the new introduction fits better the scopes of the paper and describes the scientific relevance of studying this sequence.

Discussion section: Both the title and the conclusion emphasize that this earthquake sequence is in a fault zone early in its seismic cycle. why it is important? How is it different from other moderate magnitude earthquakes in the other stage of the seismic cycle?

Reply: We aimed at emphasizing that the 2022 M 6 Gölyaka-Düzce event was the largest earthquake in the region after the M > 7 1999 sequence. In this version, we have more explicitly stated about the relatively low elastic strain accumulated on this fault zone in the broad sense, while the segment that ruptured corresponds to a highly stressed segment that did not fail in the previous 1999 sequence. This topic is now more highlighted both in the intro and the discussion sections.

**Minor comments:**

**Introduction section:**

1<sup>st</sup> Paragraph of Introduction section: Can you provide the full name of “GEOFON, KOERI, USGS, GCMT” somewhere in the main text or supplementary material? It is difficult for audiences to find and check these resources if they do not know these before.

Reply: The corresponding abbreviations and web addresses have been added as footnotes. Note that GEOFON is the full name and not an abbreviation.

3<sup>rd</sup> paragraph of Introduction section: Where is “Sapanca segment”, “Karadere fault”, and “Almacik Block”?

Reply: As a reshape of the introduction to better highlight the scientific key questions, these references to places have been removed.

5<sup>th</sup> paragraph of Introduction section: It would be better to label “Karadere fault” in fig1 so that we can know where the aftershocks are. Is it possible to have a supplementary figure showing the locations of these aftershocks?

Reply: As part of reshaping the intro, this sentence has been moved to Data and Method / Results, where we compare the original (KOERI) and our here derived catalog.

**Data and method section:**

1<sup>st</sup> paragraph of section 2.1: Can you provide more details about the “decade-long evolution of seismicity”? From which year to which year? How many events in total?

Reply: We thank the reviewer for the comment, and we have updated the analysis timing (1990-2022), including the number of events reported by institutions as well as magnitude ranges.

2<sup>nd</sup> paragraph in section 2.1: What do you mean by “a better fit to the lower magnitudes of the magnitude-frequency distribution”? How do you define the misfit? Usually, lower  $M_c$  may have worse fit when the  $M_c$  is lower than the actual  $M_c$ . Do you mean that this probabilistic approach usually results in a relatively higher  $M_c$  so that it fits the curve better? Based on the insets in Fig.2, it seems like this probabilistic approach results in a larger  $M_c$  compared with maximum curvature method.

Reply: We acknowledge the point stated by the reviewer. We have changed the manuscript, describing that the method fits the number of earthquakes as a function of magnitudes, employing all event catalogs, removing the statement: "a better fit to the lower magnitudes of the magnitude-frequency distribution." The reviewer rightly mentions that our method is more conservative than the maximum curvature method. Still, our approach has the advantage of using all catalog events to estimate the  $M_c$ , reason why we think it is more appropriate, even when it provides a higher  $M_c$  estimation.

2<sup>nd</sup> paragraph of section 2.2: Phasenet is trained on labeled waveforms from Northern California instead of southern California.

Reply: Thank you for noticing the mistake ! We have corrected that.

Section 2.2: Could you please provide a comparison between your enhanced catalog and the catalogs from AFAD and KOERI? In this way, we will have a better understanding of the accuracy and the improvements of the new catalog. It seems like Fig 3 shows the comparisons but there is no description in the main text about the details of Fig 3b.

Reply: We have now added some additional sentences describing the initial catalog as follows: “As a comparison, KOERI reported on a total of 505 events 249 aftershocks with magnitudes  $\geq M_L$  0.5 for the same spatio-temporal region analyzed here (Fig 3b). The aftershock epicenters from the KOERI catalog followed the trend of the Karadere fault northeastward of the section activated during the 1999 Izmit rupture. Out of them, 440 correspond to common events from both catalogs.”

A closer look to the missing events by our catalog, suggests that most of the events missed by our methodology occurred during the hours following the mainshock. This missing seems to originate both from missing picks with Phasenet, possibly related to low frequency noise associated to the coda of the mainshock as well as from the association of the picks.

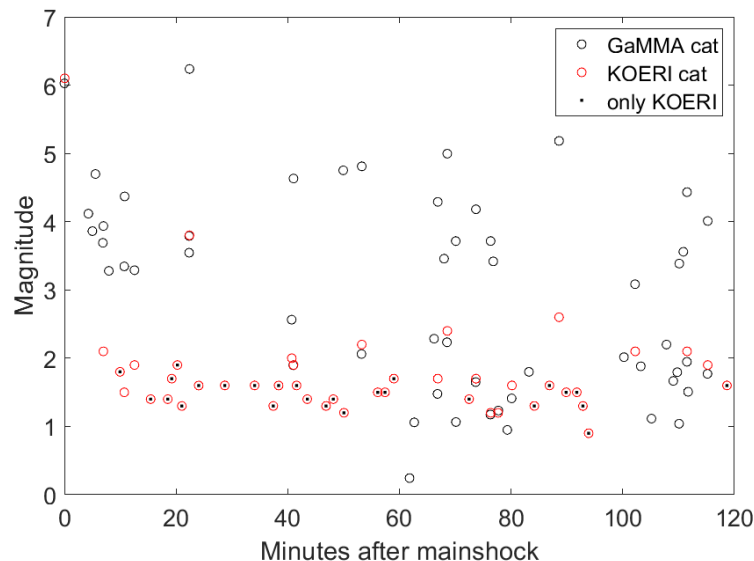

**Cover Letter Figure 1:** Comparison of events included in our catalog of detections (Gamma catalog), and those from KOERI catalog. Red circles with black dots represent the events missing in our catalog.

2<sup>nd</sup> paragraph of Section 2.3: If you use a window length of 25s, you are using both the arrival and the coda of the P- and S-wave. Will it also include surface wave when the epicentral distance is small?

Reply: Both direct arrivals and early coda waves are included in the computed window; given the station we used (200 – 800km), P- and S-windows generally are not overlapped. For potential surface waves, we checked

all S-wave segments and removed those potentially containing surface waves, which shows larger amplitude and would lead to overestimation of seismic moment.

3<sup>rd</sup> and 4<sup>th</sup> paragraph of section 2.3: What is “P- or S-wave trains”? In this inversion, do you assume that Q value is constant from the source to the receiver? It seems like the inversion is performed independently at each station. Have you considered uniform M<sub>0</sub> at all stations for the same event and uniform Q value for the similar source-receiver path during the inversion? Also, considering that you are trying to fit individual observation to the Brune’s model without using EGF here, have you considered the site effect?

Reply: It could be changed to “P- or S-wave”. Indeed, we obtain a Q for each observation from each station representing the overall contribution along the entire ray path. Each inversion for 3 independent parameters was performed separately for each station. This selection was made consciously to minimize the potential of bias of source parameters that could be introduced by source-receiver and station-specific issues such as insufficient knowledge on path-related attenuation, site effects or sensor characteristics for a particular station. The outlying results were then removed from the analysis leading to a robust solution. We do not know if the assumption of distance-dependent Q is advocated, and we did not wish to bias the resolved corner frequencies by assuming a specific Q value.

Last paragraph of section 2.3: Are you still use 25s window for analyzing azimuthal variation of ASTF? Usually, the directivity effect is only obvious at the very early stage of P- and S-wave arrivals because multiples and coda waves will smear the directivity effect. If not, how do you choose time window for calculating ASTF?

Reply: Indeed, in the EGF method we tested/investigated shorter time windows (e.g. 10 s and 5 s) to focus on the initial part of the seismogram that should contain source-related processes. We agree that the directivity effect should be obvious at the early portion of P- and S-wave, thus we employ the approach in which we use the initial stage P-wave segments and check the azimuthal variation of them. The inconclusive results from ASTF approach may come from other reasons such as complex source process or limited EGFs. In this version, we now made clear in the Supplementary Text S2 that shorter windows were used.

#### **Result section:**

Last sentence on Page 10: Figs 5e-5f show that there are less than 10 background events in total in Karadere Fault zone in the past several decades. Therefore, is it possible that the increase of background event rate after 1999 may only be caused by increasing number stations in this region after the 1999 Izmit earthquake? Moreover, there are limited number of background event to evaluate the increase and decrease of background seismicity rate after the 2014 Saros earthquake.

Reply: We appreciate the remark. Unfortunately, we do not have access to the temporal evolution of the network in the area. Even though this information is unavailable, the region is quite close to the one struck by the 1999 Duzce earthquake, which is a well-recorded sequence. In addition, we note that we did not change the magnitude of completeness of the catalog before and after the sequence, and therefore we only worked with event magnitudes that could be detected since 1990. Therefore, we believe in the temporal behavior observed by our results in all segments.

1<sup>st</sup> paragraph of section 3.3: If we only consider the very early aftershocks (dark dots in Fig. 9b 9c), the width of the fault could be shorter. And the estimated dip angle of the fault plane can also change a lot (larger dip angle along AA’ and smaller dip angle along BB’)

Reply: Thanks for the suggestion. We add the following sentence in the end of the paragraph: "...The small  $f_{CP}/f_{CS}$  ratio might imply that the fault width  $W$  could be overestimated from the aftershock distribution and could be smaller than 8 km, which is also supported by the narrower fault width estimated from the early aftershock distribution (Fig. 9)"

**Discussion:**

2<sup>nd</sup> paragraph of section 4.1: Is it possible to calculate the b-value variation in Karadere segment to see whether there is a decrease of b-value with time (possible increase of stress)?

Reply: Due to the limited amount of seismicity on the fault, particularly before 1999, we are not sure that we can reliably estimate the temporal evolution of b-value on the Kadere fault. Also, the magnitude of completeness is very high over the entire time period, and, although there are currently techniques to overcome this problem (i.e. the b+ technique by Van der Elst), we still hesitate about the potential outcome of such analysis with the current seismicity catalog. This can be the subject of a separate analysis at a regional scale with decreased magnitude of completeness.

2<sup>nd</sup> paragraph of section 4.2: It is difficult to imagine homogeneous local stress in this area considering the fault segments and the fact that this area acts as a barrier (maybe large stress heterogeneity?) during the 1999 Izmit earthquake rupture. Do you have any other evidence indicating homogeneous stress condition? Like consistent focal mechanisms?

Reply: Unfortunately not so many focal mechanisms are available for this region. Örgülü and Aktar (2001) determined some moment tensors for the large aftershocks of the Izmit-Duzce sequence. In the study region, 5 moment tensors are available, 4 consistent with the Duzce fault, and 1 consistent with the Karadere fault. We do not think that this is conclusive towards or against our hypothesis of an homogeneous stress field.

1<sup>st</sup> paragraph of section 4.3: Another important reason is the ASTF only use less than 4s (fig 10) while source spectra use 25s-time window including a mixture of multiples that suppress the directivity effects.

Reply: Same as the above comment on "Last paragraph of section 2.3".

Last sentence of section 4.4: It seems like the analysis of head waves and the suggestion of bimaterial ruptures may only work along the fault interface with strong material property contrasts. But for earthquakes in the rock volume without significant relative displacement, their rupture directivities cannot be affected by bimaterial interface and may be related to other factors. It is important to note this difference between directivity in the region and along a bimaterial interface.

Reply: Thank you for this important remark, we have added a sentence in the last paragraph of the discussion stating this comment: "However, this only applies if earthquakes are located along the bimaterial interface. For earthquakes located on secondary splay faults or in the rock volume, their rupture directivities may be related to other factors."

**Figure:**

Fig. 1: Y-axis ticks are not uniform with some of them overlapping with each other. Can you also show the scale bar in fig 1b and 1c?

Reply: Thank you , we have corrected the overlapping axes. Instead of directly adding the scale as the figure insets are quite small, we also marked with a rectangle the area represented in (c) to give a better sense of the scale.

Fig 7: Is it better to use the same x ticks for both fig 7a and 7b?

Reply: Good idea, we have adjusted the ticks accordingly.
